# Supplementary material for: Effectiveness of manual lymphatic drainage and intermittent pneumatic compression in lymphedema maintenance therapy
Source: Atypon-hosted journal article supplement (doi:10.1024/0301-1526/a001090), 2023-10-16
Supplement: 0301-1526_a001090_esm1.pdf [file 0301-1526_a001090_esm1.pdf]

## Electronic supplementary material

### ESM 1. General characteristics of the included subjects (N=18)

| <b>N=18</b>                 | <b>Mean</b> | <b>Std-Dev.</b> | <b>Median</b> | <b>Min.</b> | <b>Max.</b> |
|-----------------------------|-------------|-----------------|---------------|-------------|-------------|
| Age                         | 59.6        | 9.2             | 56            | 48          | 79          |
| BMI at start                | 33.7        | 7.6             | 34.6          | 20.9        | 47.2        |
| Duration of illness (years) | 7.7         | 4.9             | 6.5           | 2           | 20          |
| MLD since ... years         | 6.4         | 3.2             | 6             | 2           | 14          |
| MLD frequency per week      | 1.5         | 0.6             | 1             | 1           | 3           |
|                             | <b>N</b>    | <b>Percent</b>  |               |             |             |
| Sex                         |             |                 |               |             |             |
| female                      | 14          | 78%             |               |             |             |
| male                        | 4           | 22%             |               |             |             |
| Side                        |             |                 |               |             |             |
| both                        | 11          | 61%             |               |             |             |
| only right                  | 5           | 28%             |               |             |             |
| only left                   | 2           | 11%             |               |             |             |
| Type of Lymphedema          |             |                 |               |             |             |
| primary                     | 5           | 28%             |               |             |             |
| secondary                   | 13          | 72%             |               |             |             |
| obesity-related             | 8           | 44%             |               |             | §           |
| after cancer                | 4           | 22%             |               |             |             |
| after vascular surgery      | 1           | 6%              |               |             |             |
| Diseases                    |             |                 |               |             |             |
| Arterial hypertension       | 9           | 61%             |               |             |             |
| hypothyroidism              | 3           | 28%             |               |             |             |
| Tumors                      | 4           | 28%             |               |             |             |
| Heart failure               | 1           | 11%             |               |             |             |
| Regular medication needed   |             |                 |               |             |             |
| no                          | 4           | 22%             |               |             |             |
| yes                         | 18          | 78%             |               |             |             |
