# Supplementary material for: Effectiveness of manual lymphatic drainage and intermittent pneumatic compression in lymphedema maintenance therapy
Source: Atypon-hosted journal article supplement (doi:10.1024/0301-1526/a001090), 2023-10-16
Supplement: 0301-1526_a001090_esm2.pdf [file 0301-1526_a001090_esm2.pdf]

## Electronic supplementary material

### ESM 2. Final assessment of the different therapy options

| Simultaneous treatment with IPC and MLD is |    | The possibility to choose both would be |    | Optimal option “for me” is |    | Wellbeing and time management was optimal with |    |
|--------------------------------------------|----|-----------------------------------------|----|----------------------------|----|------------------------------------------------|----|
| Very helpful                               | 6  | Too much                                | 2  | MLD alone                  | 3  | MLD alone                                      | 6  |
| Helpful                                    | 6  | Sufficient                              | 14 | IPC alone                  | 3  | IPC alone                                      | 4  |
| No difference                              | 6  | Too little                              | 2  | MLD and IPC                | 12 | MLD and IPC                                    | 8  |
| Total                                      | 18 | Total                                   | 18 | Total                      | 18 | Total                                          | 18 |
